# Supplementary material
Source: PubMed Central journal article supplement (PMC9924426)
Supplement: NIHMS1855959-supplement-1855959_Sup_Info.pdf [file NIHMS1855959-supplement-1855959_Sup_Info.pdf]

# **Supplement Data for: Profiling of Circulating Gene Expression Reveals Molecular Signatures Associated with Intracranial Aneurysm Rupture Risk**

Kerry E. Poppenberg PhD<sup>1,2</sup>, Aichi Chien PhD<sup>5</sup>, Briana A. Santo<sup>1,3</sup>, Lee Chaves PhD<sup>1,2</sup>, Sricharan S. Veeturi<sup>1,4</sup>, Muhammad Waqas MBBS<sup>1,2</sup>, Andre Monteiro MD<sup>1,2</sup>, Adam A. Dmytriw MD MPH<sup>6</sup>, Jan-Karl Burkhardt MD<sup>7</sup>, Maxim Mokin MD-PhD<sup>8</sup>, Kenneth V. Snyder MD-PhD<sup>1,2</sup>, Adnan H. Siddiqui MD-PhD<sup>1,2</sup>, \*Vincent M. Tutino PhD<sup>1,2,3,4</sup>

<sup>1</sup>Canon Stroke and Vascular Research Center; <sup>2</sup>Department of Neurosurgery, <sup>3</sup>Department of Pathology and Anatomical Sciences, <sup>4</sup>Department of Mechanical and Aerospace Engineering, , University at Buffalo, Buffalo, NY, USA

<sup>5</sup>Department of Radiology, University of California Los Angeles, Los Angeles, CA, USA

<sup>6</sup>Neuroendovascular Program, Massachusetts General Hospital, Harvard Medical School, Boston, MA, USA

<sup>7</sup>Department of Neurosurgery, University of Pennsylvania, Philadelphia, PA, USA

<sup>8</sup>Department of Neurosurgery, University of South Florida, Tampa, FL, USA

## **Email Addresses:**

### **\*Corresponding Author:**

Vincent M. Tutino, PhD

Canon Stroke and Vascular Research Center

Clinical Translational Research Center

875 Ellicott Street

Buffalo, New York 14203 USA

Email: [vincentt@buffalo.edu](mailto:vincentt@buffalo.edu)

Phone: (716) 829-5400

Fax: (716) 854-1850

## SUPPLEMENTAL TABLES

**Supplemental Table 1. Primers used for qPCR.\***

| <b>Gene</b>         | <b>Primer Sequence</b>                                      | <b>qPCR Prod. Length (bp)</b> |
|---------------------|-------------------------------------------------------------|-------------------------------|
| <i>DEFA1</i>        | 5'-CAAAGCATCCAGGCTCAAGG-3'<br>5'-CAAGCTCAGCAGCAGAATGC-3'    | 127                           |
| <i>FNI</i>          | 5'-GGACGCATCACTTGCACTTC-3'<br>5'-GATGCACTGGAGCAGGTTTC-3'    | 117                           |
| <i>HBA1</i>         | 5'-GGTCAACTTCAAGCTCCTAAGC-3'<br>5'-CAAGGGGCAAGAAGCATGG-3'   | 177                           |
| <i>MSLN</i>         | 5'-ACCTAACATTTCCAGCCTCTCC-3'<br>5'-GGAATAGCAGCAGGTCCAATG-3' | 212                           |
| <i>RPL3L</i>        | 5'-ATTCGGGTCATTGTCCACAC-3'<br>5'-CCTCACTCTGGCTGAACACG-3'    | 169                           |
| <i>USP9Y</i>        | 5'-CTCAGCATCTCTTCCAACAGAAC-3'<br>5'-TCATCCAGGTTTGCCAGCTC-3' | 193                           |
| <i>HPRT1</i>        | 5'-TGGCGTCGTGATTAGTGATG-3'                                  | 131                           |
| <i>Housekeeping</i> | 5'-CAAGACGTTCAGTCCTGTCC-3'                                  |                               |
| <i>GPI</i>          | 5'-TCATCATTGCCTCCAAGACC-3'                                  | 194                           |
| <i>Housekeeping</i> | 5'-CACCCAATCCAGAACTCG-3'                                    |                               |

\* Abbreviations: bp=base pair, Prod.=product, qPCR=quantitative polymerase chain reaction

**Supplemental Table 2. Patient and IA Characteristics per Each Risk Stratification.\***

| <b>Patient Characteristics</b>                               | <b>Per Size Stratification</b> |                  | <b>Per PHASES Stratification</b> |                  |
|--------------------------------------------------------------|--------------------------------|------------------|----------------------------------|------------------|
|                                                              | <i>Low-Risk</i>                | <i>High-Risk</i> | <i>Low-Risk</i>                  | <i>High-Risk</i> |
| Age (avg. years $\pm$ s.d.)                                  | 57.4 $\pm$ 11.6                | 57.2 $\pm$ 12.6  | 55.2 $\pm$ 12.6                  | 60.8 $\pm$ 10.3  |
| Female ( <i>n/n<sub>total</sub></i> )                        | 29/37 (78.4%)                  | 21/31 (67.7%)    | 32/42 (81.0%)                    | 18/26 (69.2%)    |
| Smoking ( <i>n/n<sub>total</sub></i> )                       | 10/37 (27.0%)                  | 9/31 (29.0%)     | 13/42 (31.0%)                    | 6/26 (23.1%)     |
| Hypertension ( <i>n/n<sub>total</sub></i> )                  | 15/37 (40.5%)                  | 15/31 (48.4%)    | 13/42 (31.0%)                    | 17/26 (65.4%)    |
| Family history of IA ( <i>n/n<sub>total</sub></i> )          | 6/37 (16.2%)                   | 3/31 (9.7%)      | 8/42 (19.1%)                     | 1/26 (3.9%)      |
| <b>Aneurysm Characteristics</b>                              |                                |                  |                                  |                  |
| Patients with multiple IAs<br>( <i>n/n<sub>total</sub></i> ) | 7/37 (18.9%)                   | 8/31 (25.8%)     | 8/42 (19.1%)                     | 7/26 (26.9%)     |
| IA size (avg. mm $\pm$ s.d.)                                 | 2.63 $\pm$ 0.9                 | 7.04 $\pm$ 3.3   | 3.52 $\pm$ 1.73                  | 6.15 $\pm$ 4.05  |
| IA location ( <i>n/n<sub>total</sub></i> )                   |                                |                  |                                  |                  |
| ACom                                                         | 5/49 (10.2%)                   | 4/40 (10.0%)     | 4/52 (7.7%)                      | 5/37 (13.5%)     |
| BA                                                           | 4/49 (8.2%)                    | 3/40 (7.5%)      | 3/52 (5.8%)                      | 4/37 (10.8%)     |
| ICA                                                          | 23/49 (46.9%)                  | 21/40 (52.5%)    | 35/52 (67.3%)                    | 9/37 (24.3%)     |
| MCA                                                          | 7/49 (14.3%)                   | 6/40 (15.0%)     | 5/52 (9.6%)                      | 8/37 (21.6%)     |
| PCom                                                         | 10/49 (20.4%)                  | 6/40 (15.0%)     | 5/52 (9.6%)                      | 11/37 (29.7%)    |

\*These clinical factors were retrieved from patients' medical records. With the exception of age, these datapoints were quantified as binary data points. (Abbreviations: IA=intracranial aneurysm, n=number, avg.=average, s.d.=standard deviation, ACom=anterior communicating artery, BA=basilar artery, ICA=internal carotid artery, MCA=middle cerebral artery, PCom=posterior communicating artery, PHASES=population, hypertension, age, size of aneurysm, earlier SAH from another aneurysm, site of aneurysm)

**Supplemental Table 3. RNA Quality and Sequencing QC Metrics.\***

| <b>Sample ID</b> | <b>260/280</b> | <b>RIN</b> | <b>M Seqs</b> | <b>% Ass.</b> | <b>M Ass.</b> | <b>% Aligned</b> |
|------------------|----------------|------------|---------------|---------------|---------------|------------------|
| UIA1             | 2.00           | 8.46       | 71.9          | 22.8%         | 24.1          | 96.5%            |
| UIA2             | 2.00           | 8.46       | 71.9          | 18.1%         | 20.9          | 96.3%            |
| UIA3             | 2.01           | 9.59       | 62.9          | 23.6%         | 20.6          | 95.6%            |
| UIA4             | 1.85           | 8.25       | 49.3          | 20.6%         | 13.7          | 95.9%            |
| UIA5             | 2.03           | 9.49       | 50.8          | 23.7%         | 18.3          | 96.5%            |
| UIA6             | 1.98           | 9.49       | 52.2          | 21.8%         | 17.3          | 96.5%            |
| UIA7             | 1.98           | 9.59       | 49.3          | 27.7%         | 17.6          | 95.0%            |
| UIA8             | 1.66           | 7.40       | 36.3          | 20.2%         | 10.4          | 95.8%            |
| UIA9             | 1.87           | 6.70       | 65.6          | 4.0%          | 8.0           | 98.0%            |
| UIA10            | 1.93           | 6.50       | 51.4          | 22.6%         | 15.0          | 96.8%            |
| UIA11            | 2.04           | 9.38       | 54.9          | 24.0%         | 18.4          | 96.7%            |
| UIA12            | 2.06           | 8.90       | 66.3          | 21.9%         | 19.3          | 96.8%            |
| UIA13            | 2.01           | 9.80       | 44.7          | 24.9%         | 14.5          | 96.4%            |
| UIA14            | 1.92           | 7.60       | 44.2          | 25.3%         | 15.1          | 96.2%            |
| UIA15            | 1.92           | 6.00       | 56.5          | 22.1%         | 14.5          | 95.1%            |
| UIA16            | 1.95           | 6.80       | 47.7          | 28.4%         | 16.3          | 96.2%            |
| UIA17            | 1.97           | 9.20       | 49.0          | 27.7%         | 19.2          | 95.5%            |
| UIA18            | 2.04           | 8.90       | 46.2          | 23.0%         | 15.1          | 96.4%            |
| UIA19            | 2.02           | 7.20       | 69.6          | 24.2%         | 20.2          | 96.1%            |
| UIA20            | 1.95           | 6.10       | 70.5          | 9.3%          | 15.6          | 97.4%            |
| UIA21            | 1.96           | 8.90       | 71.3          | 12.0%         | 18.3          | 97.2%            |
| UIA22            | 1.96           | 6.10       | 33.0          | 23.0%         | 9.3           | 96.2%            |
| UIA23            | 1.96           | 7.84       | 59.3          | 22.4%         | 15.9          | 95.4%            |
| UIA24            | 2.03           | 9.38       | 53.3          | 22.5%         | 18.0          | 95.6%            |
| UIA25            | 2.06           | 9.00       | 51.3          | 25.2%         | 17.9          | 96.2%            |
| UIA26            | 2.03           | 9.10       | 66.2          | 26.8%         | 25.2          | 96.4%            |
| UIA27            | 2.02           | 9.00       | 59.9          | 26.6%         | 21.5          | 96.1%            |
| UIA28            | 1.97           | 7.90       | 51.0          | 24.1%         | 17.5          | 96.6%            |
| UIA29            | 2.04           | 9.38       | 69.6          | 25.2%         | 24.1          | 96.3%            |
| UIA30            | 2.02           | 9.07       | 34.0          | 24.6%         | 9.7           | 97.1%            |
| UIA31            | 1.92           | 8.66       | 35.6          | 26.5%         | 10.8          | 97.4%            |
| UIA32            | 2.03           | 9.07       | 38.7          | 26.3%         | 11.7          | 97.4%            |
| UIA33            | 2.07           | 8.56       | 69.4          | 23.7%         | 22.9          | 96.6%            |
| UIA34            | 2.03           | 8.77       | 40.2          | 25.5%         | 12.8          | 97.1%            |
| UIA35            | 2.06           | 9.28       | 35.3          | 24.6%         | 10.4          | 97.1%            |
| UIA36            | 2.06           | 9.18       | 40.6          | 25.0%         | 12.3          | 97.1%            |
| UIA37            | 1.97           | 8.15       | 33.6          | 23.5%         | 9.2           | 97.2%            |

|       |      |      |      |       |      |       |
|-------|------|------|------|-------|------|-------|
| UIA38 | 2.03 | 8.87 | 40.8 | 25.7% | 12.8 | 96.8% |
| UIA39 | 1.97 | 9.69 | 26.1 | 22.5% | 7.3  | 96.9% |
| UIA40 | 2.04 | 8.97 | 40.7 | 25.3% | 12.2 | 96.9% |
| UIA41 | 2.05 | 9.07 | 20.0 | 27.0% | 6.6  | 96.9% |
| UIA42 | 2.05 | 8.56 | 44.2 | 26.9% | 14.2 | 97.2% |
| UIA43 | 1.97 | 8.66 | 35.2 | 25.2% | 10.4 | 97.0% |
| UIA44 | 1.99 | 8.66 | 37.2 | 25.8% | 11.3 | 97.0% |
| UIA45 | 2.05 | 8.35 | 30.3 | 28.0% | 10.0 | 97.4% |
| UIA46 | 2.05 | 8.77 | 34.8 | 25.9% | 10.7 | 97.1% |
| UIA47 | 2.06 | 8.46 | 33.9 | 25.4% | 10.5 | 97.0% |
| UIA48 | 2.04 | 8.15 | 34.2 | 26.6% | 10.5 | 97.2% |
| UIA49 | 2.03 | 8.15 | 38.6 | 26.4% | 12.4 | 96.7% |
| UIA50 | 1.77 | 8.15 | 32.0 | 25.3% | 10.0 | 96.9% |
| UIA51 | 2.04 | 9.18 | 45.4 | 24.2% | 13.7 | 96.9% |
| UIA52 | 1.82 | 8.04 | 48.9 | 28.1% | 16.6 | 96.7% |
| UIA53 | 2.04 | 8.04 | 46.3 | 24.7% | 14.0 | 97.1% |
| UIA54 | 2.06 | 8.87 | 42.9 | 22.5% | 11.9 | 96.8% |
| UIA55 | 2.01 | 8.97 | 37.6 | 25.5% | 11.5 | 97.2% |
| UIA56 | 2.09 | 7.63 | 32.2 | 30.7% | 12.6 | 96.6% |
| UIA57 | 1.98 | 8.15 | 38.4 | 26.3% | 12.4 | 97.4% |
| UIA58 | 2.04 | 8.97 | 31.9 | 27.0% | 10.5 | 96.9% |
| UIA59 | 1.95 | 8.56 | 51.1 | 23.2% | 14.3 | 96.7% |
| UIA60 | 1.05 | 7.94 | 34.0 | 28.9% | 12.6 | 96.7% |
| UIA61 | 2.01 | 7.94 | 35.9 | 23.0% | 9.8  | 97.3% |
| UIA62 | 2.05 | 8.66 | 37.9 | 24.6% | 11.6 | 96.5% |
| UIA63 | 2.05 | 8.46 | 31.2 | 28.0% | 11.6 | 95.3% |
| UIA64 | 1.77 | 8.87 | 33.3 | 27.8% | 11.9 | 96.7% |
| UIA65 | 2.05 | 8.56 | 34.1 | 25.7% | 10.7 | 97.0% |
| UIA66 | 2.06 | 7.73 | 39.0 | 26.0% | 12.1 | 96.7% |
| UIA67 | 1.98 | 8.10 | 66.3 | 24.6% | 20.4 | 96.8% |
| UIA68 | 2.01 | 8.77 | 66.6 | 21.6% | 19.7 | 96.0% |

\* “Assigned” refers to alignments assigned to genome features, whereas “aligned” refers to aligned reads that overlap genes. Abbreviations: Ass.=assigned, QC=quality control, RIN=RNA integrity number, M=million

**Supplemental Table 4. Differentially Expressed Genes Associated with IA Risk as Defined by IA size or PHASES score.\***

| Gene Name       | Ensembl ID         | Size      |         | PHASES    |         |
|-----------------|--------------------|-----------|---------|-----------|---------|
|                 |                    | Log2(F-C) | q-value | Log2(F-C) | q-value |
| <i>A4GALT</i>   | ENSG00000128274.15 |           |         | 1.292     | 0.000   |
| <i>ABCA13</i>   | ENSG00000179869.14 |           |         | -1.080    | 0.000   |
| <i>ABO</i>      | ENSG00000175164.13 | 1.159     | 0.002   |           |         |
| <i>ACOT12</i>   | ENSG00000172497.8  | -1.268    | 0.001   |           |         |
| <i>ADAMTS2</i>  | ENSG00000087116.13 |           |         | -2.019    | 0.000   |
| <i>ADORA1</i>   | ENSG00000163485.15 |           |         | -1.273    | 0.001   |
| <i>ANKRD61</i>  | ENSG00000157999.5  |           |         | -1.583    | 0.002   |
| <i>AVPR2</i>    | ENSG00000126895.13 |           |         | 1.041     | 0.001   |
| <i>BTNL3</i>    | ENSG00000168903.8  |           |         | -1.447    | 0.000   |
| <i>C10orf55</i> | ENSG00000222047.8  |           |         | -1.181    | 0.022   |
| <i>C1orf53</i>  | ENSG00000203724.10 |           |         | 1.203     | 0.001   |
| <i>C4BPA</i>    | ENSG00000123838.10 | -1.427    | 0.000   |           |         |
| <i>C4orf47</i>  | ENSG00000205129.8  | 1.058     | 0.001   |           |         |
| <i>C9orf129</i> | ENSG00000204352.2  |           |         | 1.261     | 0.000   |
| <i>CFAP46</i>   | ENSG00000171811.12 |           |         | 1.296     | 0.000   |
| <i>CHRNA7</i>   | ENSG00000175344.16 |           |         | 1.050     | 0.014   |
| <i>CHSY3</i>    | ENSG00000198108.3  | 1.012     | 0.029   |           |         |
| <i>CLDN22</i>   | ENSG00000177300.6  | 1.426     | 0.000   |           |         |
| <i>CLGN</i>     | ENSG00000153132.12 |           |         | 1.106     | 0.001   |
| <i>CMBL</i>     | ENSG00000164237.8  |           |         | 1.245     | 0.000   |
| <i>CNTNAP3B</i> | ENSG00000154529.14 |           |         | 1.083     | 0.008   |
| <i>COL17A1</i>  | ENSG00000065618.16 |           |         | -1.250    | 0.000   |
| <i>CRISPLD1</i> | ENSG00000121005.8  |           |         | -1.359    | 0.001   |
| <i>CSMD1</i>    | ENSG00000183117.17 | 1.564     | 0.000   |           |         |
| <i>CTNNA2</i>   | ENSG00000066032.18 |           |         | -1.671    | 0.011   |
| <i>CYP4B1</i>   | ENSG00000142973.12 | -1.024    | 0.001   |           |         |
| <i>DDX3Y</i>    | ENSG00000067048.16 |           |         | 2.168     | 0.000   |
| <i>DEFA1</i>    | ENSG00000206047.2  | -1.087    | 0.008   | -2.221    | 0.000   |
| <i>DEFA3</i>    | ENSG00000239839.5  |           |         | -1.390    | 0.000   |
| <i>DEFA4</i>    | ENSG00000164821.4  |           |         | -1.367    | 0.000   |
| <i>DNER</i>     | ENSG00000187957.7  |           |         | -1.657    | 0.001   |
| <i>EDIL3</i>    | ENSG00000164176.12 | -1.038    | 0.000   | 1.586     | 0.000   |
| <i>ELF5</i>     | ENSG00000135374.9  |           |         | 1.227     | 0.000   |
| <i>ELN</i>      | ENSG00000049540.16 | 1.094     | 0.000   |           |         |
| <i>ESPN</i>     | ENSG00000187017.14 |           |         | 1.195     | 0.000   |
| <i>FAM107A</i>  | ENSG00000168309.16 |           |         | 1.062     | 0.004   |

|                |                    |        |       |        |       |
|----------------|--------------------|--------|-------|--------|-------|
| <i>FAM181B</i> | ENSG00000182103.4  |        |       | -1.400 | 0.000 |
| <i>FAM3B</i>   | ENSG00000183844.16 |        |       | 1.639  | 0.002 |
| <i>FAM83A</i>  | ENSG00000147689.16 |        |       | 1.605  | 0.000 |
| <i>FN1</i>     | ENSG00000115414.18 | -2.397 | 0.000 | -1.920 | 0.000 |
| <i>FOXJ1</i>   | ENSG00000168269.8  |        |       | 1.293  | 0.005 |
| <i>GAD1</i>    | ENSG00000128683.13 | -1.026 | 0.005 |        |       |
| <i>GDF15</i>   | ENSG00000130513.6  |        |       | 1.201  | 0.000 |
| <i>GLYATL2</i> | ENSG00000156689.6  |        |       | 1.310  | 0.000 |
| <i>GSTM1</i>   | ENSG00000134184.12 |        |       | 1.282  | 0.003 |
| <i>HBA1</i>    | ENSG00000206172.8  | 1.005  | 0.018 | 1.016  | 0.032 |
| <i>HBA2</i>    | ENSG00000188536.12 | 1.055  | 0.002 | 1.097  | 0.001 |
| <i>HBG1</i>    | ENSG00000213934.6  |        |       | 1.743  | 0.000 |
| <i>HOXB9</i>   | ENSG00000170689.9  |        |       | 1.553  | 0.000 |
| <i>IFI27</i>   | ENSG00000165949.12 | -2.112 | 0.000 |        |       |
| <i>IGSF9</i>   | ENSG00000085552.16 |        |       | 1.102  | 0.001 |
| <i>IL2</i>     | ENSG00000109471.4  |        |       | 1.212  | 0.038 |
| <i>KCNJ1</i>   | ENSG00000151704.15 | 1.256  | 0.000 |        |       |
| <i>KLF14</i>   | ENSG00000266265.2  | -1.066 | 0.001 |        |       |
| <i>LITD1</i>   | ENSG00000240563.1  |        |       | 1.325  | 0.000 |
| <i>LOXL4</i>   | ENSG00000138131.3  |        |       | 1.111  | 0.000 |
| <i>LPL</i>     | ENSG00000175445.14 | -1.249 | 0.000 |        |       |
| <i>MMP8</i>    | ENSG00000118113.11 |        |       | -1.524 | 0.000 |
| <i>MMRN2</i>   | ENSG00000173269.13 | 1.255  | 0.000 |        |       |
| <i>MSLN</i>    | ENSG00000102854.14 | -1.626 | 0.000 | -1.156 | 0.000 |
| <i>MYOM2</i>   | ENSG00000036448.9  | -1.029 | 0.004 |        |       |
| <i>NAALAD2</i> | ENSG00000077616.10 |        |       | 1.034  | 0.002 |
| <i>NPAS1</i>   | ENSG00000130751.9  | -1.347 | 0.000 |        |       |
| <i>NPC1L1</i>  | ENSG00000015520.14 |        |       | 1.338  | 0.012 |
| <i>NXF3</i>    | ENSG00000147206.16 | -1.310 | 0.005 |        |       |
| <i>NYAP2</i>   | ENSG00000144460.11 | -1.144 | 0.018 |        |       |
| <i>OLFM4</i>   | ENSG00000102837.6  |        |       | -1.436 | 0.000 |
| <i>OTOF</i>    | ENSG00000115155.16 | -1.461 | 0.000 | 2.070  | 0.000 |
| <i>PALM</i>    | ENSG00000099864.17 |        |       | 1.055  | 0.000 |
| <i>PGF</i>     | ENSG00000119630.13 |        |       | 1.220  | 0.000 |
| <i>PKDCC</i>   | ENSG00000162878.12 |        |       | -1.207 | 0.006 |
| <i>PRSS42</i>  | ENSG00000178055.11 |        |       | 1.258  | 0.000 |
| <i>PRTG</i>    | ENSG00000166450.12 | -1.167 | 0.008 |        |       |
| <i>PVRL2</i>   | ENSG00000130202.9  |        |       | -1.282 | 0.000 |
| <i>RBFOX3</i>  | ENSG00000167281.18 |        |       | 1.174  | 0.001 |
| <i>RIMBP2</i>  | ENSG00000060709.13 |        |       | 1.004  | 0.000 |

|                      |                    |        |       |        |       |
|----------------------|--------------------|--------|-------|--------|-------|
| <i>RNF152</i>        | ENSG00000176641.10 |        |       | 1.190  | 0.000 |
| <i>RNF182</i>        | ENSG00000180537.12 |        |       | 1.164  | 0.000 |
| <i>ROBO1</i>         | ENSG00000169855.19 | -1.015 | 0.000 |        |       |
| <i>RP11-347C12.1</i> | ENSG00000198064.13 |        |       | 1.218  | 0.000 |
| <i>RPL3L</i>         | ENSG00000140986.7  | 1.061  | 0.017 | 1.413  | 0.000 |
| <i>RUNDC3A</i>       | ENSG00000108309.12 |        |       | 1.520  | 0.000 |
| <i>SCGB3A1</i>       | ENSG00000161055.3  | -1.072 | 0.004 |        |       |
| <i>SFRP2</i>         | ENSG00000145423.4  | 1.002  | 0.000 | 1.266  | 0.000 |
| <i>SLC16A9</i>       | ENSG00000165449.11 |        |       | 1.254  | 0.000 |
| <i>SLC39A5</i>       | ENSG00000139540.11 |        |       | 1.085  | 0.030 |
| <i>SLC51A</i>        | ENSG00000163959.9  |        |       | -1.060 | 0.000 |
| <i>SMIM6</i>         | ENSG00000259120.2  |        |       | 1.537  | 0.000 |
| <i>SPERT</i>         | ENSG00000174015.9  | 1.283  | 0.022 |        |       |
| <i>ST8SIA5</i>       | ENSG00000101638.13 |        |       | 1.111  | 0.000 |
| <i>SYTL5</i>         | ENSG00000147041.11 | -1.106 | 0.000 |        |       |
| <i>TDRD12</i>        | ENSG00000173809.15 |        |       | -1.201 | 0.000 |
| <i>TEKT3</i>         | ENSG00000125409.12 |        |       | 1.002  | 0.004 |
| <i>TMPRSS9</i>       | ENSG00000178297.12 |        |       | 1.137  | 0.000 |
| <i>TMSB4Y</i>        | ENSG00000154620.5  |        |       | 1.479  | 0.026 |
| <i>TNFSF18</i>       | ENSG00000120337.8  | 1.260  | 0.000 |        |       |
| <i>TUSC3</i>         | ENSG00000104723.20 | 1.429  | 0.000 |        |       |
| <i>USP9Y</i>         | ENSG00000114374.12 | 1.536  | 0.000 | 2.261  | 0.000 |
| <i>UTS2</i>          | ENSG00000049247.13 |        |       | 1.436  | 0.000 |
| <i>UTY</i>           | ENSG00000183878.15 |        |       | 2.760  | 0.000 |
| <i>ZFPM2</i>         | ENSG00000169946.13 |        |       | 1.170  | 0.035 |
| <i>ZFY</i>           | ENSG00000067646.11 |        |       | 1.660  | 0.006 |

\*Significantly differentially expressed transcripts with q-value<0.05, an absolute fold-change $\geq$ 2, and expression in at least 50% of samples. 36 genes were differentially expressed in IA risk analysis according to aneurysm size, 76 genes were differentially expressed in IA risk analysis according to PHASES score, and 10 genes were identified according to both, which are highlighted in grey. (Abbreviations: F-C=fold-change)



**Supplemental Table 5. Significant IPA Disease and Biological Functions for the IA Risk-Associated Differentially Expressed Genes.\***

| <b>Risk Stratification by IA Size</b>                                                                            |                   |                                         |                |                                                                                         |
|------------------------------------------------------------------------------------------------------------------|-------------------|-----------------------------------------|----------------|-----------------------------------------------------------------------------------------|
| <b>Categories</b>                                                                                                | <b>Functions</b>  | <b>Diseases or Functions Annotation</b> | <b>q-value</b> | <b>Molecules</b>                                                                        |
| Cardiovascular System Development and Function                                                                   | development       | Development of vasculature              | 0.0279         | DEFA1, EDIL3, ELN, FN1, LPL, MMRN2, ROBO1, SCGB3A1, SFRP2                               |
| Cardiovascular Disease                                                                                           | occlusion         | Occlusion of blood vessel               | 0.0279         | ABO, CSMD1, ELN, FN1, HBA1/HBA2, LPL                                                    |
| Cardiovascular Disease, Organismal Injury and Abnormalities                                                      | vaso-occlusion    | Vaso-occlusion                          | 0.0279         | ABO, CSMD1, ELN, FN1, HBA1/HBA2, LPL                                                    |
| Cardiovascular Disease, Organismal Injury and Abnormalities                                                      | atherosclerosis   | Atherosclerosis                         | 0.0302         | CSMD1, ELN, FN1, HBA1/HBA2, LPL                                                         |
| Neurological Disease, Organismal Injury and Abnormalities                                                        | cerebral disorder | Cerebral disorder                       | 0.0368         | ACOT12, C4BPA, CHSY3, ELN, FN1, GAD1, LPL, MSLN, NPAS1, OTOF, PRTG, ROBO1, RPL3L, SFRP2 |
| Cellular Movement                                                                                                | chemotaxis        | Chemotaxis                              | 0.0395         | DEFA1, ELN, FN1, ROBO1, TNFSF18                                                         |
| Cardiovascular System Development and Function, Organismal Development                                           | angiogenesis      | Angiogenesis                            | 0.0414         | DEFA1, EDIL3, ELN, FN1, ROBO1, SCGB3A1, SFRP2                                           |
| Cellular Movement                                                                                                | cell movement     | Cell movement of myeloid cells          | 0.0461         | DEFA1, EDIL3, ELN, FN1, TNFSF18                                                         |
| Cellular Movement, Hematological System Development and Function, Immune Cell Trafficking, Inflammatory Response | cell movement     | Cell movement of phagocytes             | 0.0473         | DEFA1, EDIL3, ELN, FN1, TNFSF18                                                         |
| Cardiovascular System Development and                                                                            | vasculogenesis    | Vasculogenesis                          | 0.0483         | EDIL3, ELN, FN1, ROBO1, SCGB3A1, SFRP2                                                  |

|                                  |  |  |  |  |
|----------------------------------|--|--|--|--|
| Function, Organismal Development |  |  |  |  |
|----------------------------------|--|--|--|--|

**Risk Stratification by PHASES Score**

| <b>Categories</b>                                                                                                | <b>Functions</b>      | <b>Diseases or Functions Annotation</b> | <b>B-H p-value</b> | <b>Molecules</b>                                                      |
|------------------------------------------------------------------------------------------------------------------|-----------------------|-----------------------------------------|--------------------|-----------------------------------------------------------------------|
| Cellular Movement, Hematological System Development and Function, Immune Cell Trafficking                        | cell movement         | Cell movement of granulocytes           | 0.0392             | ADORA1, CHRNA7, EDIL3, FN1, GDF15, IL2, MMP8, OLFM4, PGF              |
| Cellular Movement                                                                                                | cell movement         | Cell movement of myeloid cells          | 0.0392             | ADORA1, CHRNA7, DEFA1, EDIL3, FN1, GDF15, IL2, MMP8, OLFM4, PGF, UTS2 |
| Cellular Movement, Hematological System Development and Function, Immune Cell Trafficking                        | cell movement         | Cell movement of leukocytes             | 0.0422             | ADORA1, CHRNA7, DEFA1, EDIL3, FN1, GDF15, IL2, MMP8, OLFM4, PGF, UTS2 |
| Cellular Movement, Hematological System Development and Function, Immune Cell Trafficking, Inflammatory Response | cell movement         | Cell movement of phagocytes             | 0.0422             | ADORA1, CHRNA7, DEFA1, EDIL3, FN1, GDF15, IL2, MMP8, PGF, UTS2        |
| Cellular Movement, Hematological System Development and Function, Immune Cell Trafficking                        | cellular infiltration | Cellular infiltration by granulocytes   | 0.0429             | CHRNA7, EDIL3, MMP8, OLFM4, PGF                                       |
| Cellular Movement, Hematological System Development and Function, Immune Cell                                    | cell movement         | Cell movement of neutrophils            | 0.0459             | ADORA1, EDIL3, FN1, GDF15, MMP8, PGF                                  |

|                                                                                           |                       |                                     |        |                                                                               |
|-------------------------------------------------------------------------------------------|-----------------------|-------------------------------------|--------|-------------------------------------------------------------------------------|
| Trafficking, Inflammatory Response                                                        |                       |                                     |        |                                                                               |
| Cardiovascular System Development and Function, Organismal Development                    | angiogenesis          | Angiogenesis                        | 0.0469 | ADAMTS2, CHRNA7, DEFA1, EDIL3, FN1, GSTM1, IL2, MMP8, PGF, SFRP2, UTS2, ZFPM2 |
| Cardiovascular Disease, Organismal Injury and Abnormalities                               | atherosclerosis       | Atherosclerosis                     | 0.0479 | ADORA1, FN1, GDF15, HBA1/HBA2, MMP8, NPC1L1, PGF                              |
| Cell-To-Cell Signaling and Interaction, Cellular Assembly and Organization                | cell-cell contact     | Cell-cell contact                   | 0.0479 | CHRNA7, CLGN, FN1, GDF15, IGSF9, IL2, NECTIN2, OTOF, PALM, PGF                |
| Cellular Movement, Hematological System Development and Function, Immune Cell Trafficking | cellular infiltration | Cellular infiltration by leukocytes | 0.0479 | CHRNA7, EDIL3, FN1, IL2, MMP8, OLFM4, PGF                                     |
| Cellular Assembly and Organization                                                        | organization          | Organization of cellular membrane   | 0.0479 | A4GALT, AVPR2, CHRNA7, IGSF9, NECTIN2                                         |

\*q-value from Benjamini-Hochberg correction. Abbreviations: IPA=Ingenuity Pathway Analysis, IA=intracranial aneurysm, PHASES=population, hypertension, age, size of aneurysm, earlier SAH from another aneurysm, site of aneurysm

**Supplemental Table 6. IPA Networks.**

| <b>ID</b>     | <b>Molecules in Network</b>                                                                                                                                                                                                                                                                                                                          | <b>Score</b> | <b>Focus Molecules</b> |                                                                                           |
|---------------|------------------------------------------------------------------------------------------------------------------------------------------------------------------------------------------------------------------------------------------------------------------------------------------------------------------------------------------------------|--------------|------------------------|-------------------------------------------------------------------------------------------|
| <b>Size</b>   |                                                                                                                                                                                                                                                                                                                                                      |              |                        |                                                                                           |
| 1             | ACOT12, Akt, ANGPTL1, C4BPA, caspase, CD3, DEFA1, EDIL3, ELN, ERK1/2, FN1, GAD1, HBA1/HBA2, Histone h3, IFI27, IFN Beta, Immunoglobulin, Insulin, Jnk, KCNJ1, LPL, MIR320, MSLN, NFkB (complex), NPAS1, NYAP2, PI3K (complex), Pka, Pkc(s), ROBO1, SCGB3A1, SFRP2, TNFSF18, TUSC3, Vegf                                                              | 50           | 19                     | Embryonic Development, Organismal Development, Tissue Development                         |
| 2             | ABO, APRT, AR, ARHGAP35, ARHGEF40, CHSY3, cldn, CLDN22, CSF2RA, CSMD1, ELP3, FOXP3, H4C2, HIPK1, ICAM1, IGF receptor, IGF1R, JAM3, KLF14, Leukocyte Extravasation Signaling, MMP19, MYC, MYOM2, NEU3, NXF3, PAICS, PRTG, PSMD5, RPL24, RPL3L, SYTL5, VIRMA, WAC, WDR44, ZNF148                                                                       | 22           | 10                     | Organ Development, Tissue Development, Tissue Morphology                                  |
| <b>PHASES</b> |                                                                                                                                                                                                                                                                                                                                                      |              |                        |                                                                                           |
| 1             | A4GALT, Actin, Akt, Alpha catenin, caspase, CD3, Cdc2, COL17A1, CTNNA2, ELF5, ESPN, F Actin, FAM107A, Focal adhesion kinase, HBA1/HBA2, HBG1, hemoglobin, HOXB9, Ige, IgG, IL2, Immunoglobulin, Jnk, Mek, MSLN, NECTIN2, NPC1L1, PI3K (complex), PI3K (family), PKDCC, SFRP2, SRC (family), TCR, Vegf, ZFPM2                                         | 34           | 16                     | Connective Tissue Disorders, Organismal Development, Organismal Injury and Abnormalities  |
| 2             | ADAMTS2, ADCY, Ap1, CHRNA7, Collagen type I (complex), Collagen type II, Collagen type III, Collagen type IV, Collagen(s), DEFA1, DEFA4, DNER, EDIL3, elastase, ERK1/2, FAM3B, Fibrin, Fibrinogen, FN1, GDF15, Growth hormone, GSTM1, IL1, Metalloprotease, Mmp, MMP8, PALM, PDGF BB, PGF, Pka, PLC, Pro-inflammatory Cytokine, Rap1, Tgf beta, UTS2 | 29           | 14                     | Cellular Movement, Hematological System Development and Function, Immune Cell Trafficking |

\*Abbreviations: IPA=Ingenuity Pathway Analysis, PHASES=population, hypertension, age, size of aneurysm, earlier SAH from another aneurysm, site of aneurysm

**Supplemental Table 7. Code for Running LDA Models.**

| <b>Action</b>                                          | <b>Code</b>                                                                                                                                                                                                                                                                                                                                                                                                                                                                                                                                                                                                                                                               |
|--------------------------------------------------------|---------------------------------------------------------------------------------------------------------------------------------------------------------------------------------------------------------------------------------------------------------------------------------------------------------------------------------------------------------------------------------------------------------------------------------------------------------------------------------------------------------------------------------------------------------------------------------------------------------------------------------------------------------------------------|
| Standard Libraries<br>(Numpy, Pandas,<br>Scipy, etc)   | <pre>import scipy import pandas as pd import numpy as np from scipy import stats import statsmodels.api as sm import statistics</pre>                                                                                                                                                                                                                                                                                                                                                                                                                                                                                                                                     |
| Machine Learning<br>Libraries (sklearn)                | <pre>from sklearn.model_selection import train_test_split, GridSearchCV,     LeaveOneOut from sklearn.feature_selection import VarianceThreshold, f_classif,     GenericUnivariateSelect, mutual_info_classif, SelectKBest from sklearn.decomposition import PCA from sklearn.linear_model import LogisticRegression from sklearn.neighbors import KNeighborsClassifier from sklearn import tree from sklearn.metrics import accuracy_score, roc_curve, roc_auc_score,     confusion_matrix, classification_report from sklearn.svm import LinearSVC, SVC from sklearn.discriminant_analysis import LinearDiscriminantAnaly-     sis, QuadraticDiscriminantAnalysis</pre> |
| Post-Processing Li-<br>braries                         | <pre>import matplotlib import matplotlib.pyplot as plt import seaborn as sns import qgrid %matplotlib inline</pre>                                                                                                                                                                                                                                                                                                                                                                                                                                                                                                                                                        |
| Import and Initialize<br>Data                          | <pre>df = pd.read_csv('DESTINATION-FILE', delimiter = ',') cases = df['Sample']</pre>                                                                                                                                                                                                                                                                                                                                                                                                                                                                                                                                                                                     |
| Set the index for fea-<br>tures as the sample<br>names | <pre>features = df.loc[:, 'GENE-FIRST': 'GENE-LAST'] features = features.set_index(df['Sample'])</pre>                                                                                                                                                                                                                                                                                                                                                                                                                                                                                                                                                                    |
| Set the index for la-<br>bels as the sample<br>names   | <pre>labels = df['Outcome'] labels.index = df['Sample']</pre>                                                                                                                                                                                                                                                                                                                                                                                                                                                                                                                                                                                                             |
| Run models                                             | <pre>for i in range(100): seed=i np.random.seed(seed)  trainX , testX , trainY, testY = train_test_split(features, labels, test_size     = 20, random_state = seed, stratify = labels ) trainX_standardized = trainX testX_standardized = testX</pre>                                                                                                                                                                                                                                                                                                                                                                                                                     |

---

```
clf_lda = LinearDiscriminantAnalysis(solver='eigen', shrinkage='auto',
    priors=None, n_components=None, store_covariance=False,
    tol=0.0001)
solver=['eigen', 'lsqr']
shrinkage=['auto']
priors=[None]
n_components=[None]
store_covariance=[False]
tol=[0.0001]

param_grid = dict(solver=solver, shrinkage=shrinkage, priors=priors ,
    n_components=n_components, store_covariance=store_covariance
    , tol=tol)
loo = LeaveOneOut() ## Use Leave-One-Out Cross-validation
grid_standardized = GridSearchCV(estimator = clf_lda,
    param_grid=param_grid, n_jobs=-2, cv=loo)
grid_result_standardized = grid_standardized.fit(trainX_standardized,
    trainY)
predictions_standardized , predictions_standardized_probs =
    grid_standardized.predict(testX_standardized) , grid_standard-
    ized.predict_proba(trainX_standardized)
test_accuracy_standardized = accuracy_score(testY, predictions_stand-
    ardized)
auc_standardized = roc_auc_score(trainY,predictions_standard-
    ized_probs[:,1])

classification_report=classification_report(testY, predictions_standard-
    ized)

print("Seed #: " + seed)
print('Results using All Features')
print('All features AUC='+ str(auc_standardized))
print('All features Testing Accuracy='+ str(test_accuracy_standard-
    ized))
print(classification_report)
```

---

**Supplemental Table 8: MANCOVA Results.\****IA Size*

| <b>Gene</b> | <b>Significant Covariate</b> | <b>q-value</b> |
|-------------|------------------------------|----------------|
| ABO         | -                            | -              |
| ACOT12      | -                            | -              |
| C4BPA       | -                            | -              |
| C4orf47     | IA family history            | 0.014          |
|             | Smoking                      | 0.034          |
| CHSY3       | -                            | -              |
| CLDN22      | -                            | -              |
| CSMD1       | -                            | -              |
| CYP4B1      | -                            | -              |
| DEFA1       | -                            | -              |
| EDIL3       | -                            | -              |
| ELN         | IA family history            | 0.029          |
| FN1         | -                            | -              |
| GAD1        | -                            | -              |
| HBA1        | -                            | -              |
| HBA2        | -                            | -              |
| IFI27       | -                            | -              |
| KCNJ1       | IA family history            | 0.012          |
| KLF14       | IA family history            | 0.021          |
|             | Hypertension                 | 0.025          |
|             | Smoking                      | 0.041          |
| LPL         | Hypertension                 | 0.027          |
| MMRN2       | IA family history            | 0.017          |
| MSLN        | -                            | -              |
| MYOM2       | -                            | -              |
| NPAS1       | -                            | -              |
| NXF3        | -                            | -              |
| NYAP2       | -                            | -              |
| OTOF        | -                            | -              |
| PRTG        | -                            | -              |
| ROBO1       | -                            | -              |
| RPL3L       | -                            | -              |
| SCGB3A1     | -                            | -              |
| SFRP2       | -                            | -              |
| SPERT       | IA family history            | 0.047          |
| SYTL5       | -                            | -              |
| TNFSF18     | -                            | -              |

|       |                   |        |
|-------|-------------------|--------|
| TUSC3 | IA family history | <0.001 |
| USP9Y | -                 | -      |

***PHASES***

| <b>Gene</b> | <b>Significant Covariate</b> | <b>q-value</b> |
|-------------|------------------------------|----------------|
| A4GALT      | Sex                          | <0.001         |
| ABCA13      | -                            | -              |
| ADAMTS2     | -                            | -              |
| ADORA1      | -                            | -              |
| ANKRD61     | -                            | -              |
| AVPR2       | -                            | -              |
| BTNL3       | -                            | -              |
| C10orf55    | -                            | -              |
| C1orf53     | IA family history            | 0.024          |
| C9orf129    | -                            | -              |
| CFAP46      | -                            | -              |
| CHRNA7      | Sex                          | 0.04           |
| CLGN        | -                            | -              |
| CMBL        | Sex                          | <0.001         |
|             | Hypertension                 | 0.029          |
| CNTNAP3B    | -                            | -              |
| COL17A1     | -                            | -              |
| CRISPLD1    | -                            | -              |
| CTNNA2      | -                            | -              |
| DDX3Y       | Sex                          | <0.001         |
| DEFA1       | -                            | -              |
| DEFA3       | -                            | -              |
| DEFA4       | -                            | -              |
| DNER        | -                            | -              |
| EDIL3       | -                            | -              |
| ELF5        | -                            | -              |
| ESPN        | Sex                          | 0.012          |
|             | Smoking                      | 0.031          |
| FAM107A     | -                            | -              |
| FAM181B     | -                            | -              |
| FAM3B       | -                            | -              |
| FAM83A      | -                            | -              |
| FN1         | -                            | -              |
| FOXI1       | -                            | -              |
| GDF15       | -                            | -              |



|               |                   |        |
|---------------|-------------------|--------|
| GLYATL2       | Smoking           | 0.011  |
| GSTM1         | Sex               | 0.033  |
| HBA1          | -                 | -      |
| HBA2          | -                 | -      |
| HBG1          | -                 | -      |
| HOXB9         | -                 | -      |
| IGSF9         | IA family history | 0.042  |
| IL2           | -                 | -      |
| L1TD1         | Hypertension      | 0.012  |
| LOXL4         | -                 | -      |
| MMP8          | -                 | -      |
| MSLN          | -                 | -      |
| NAALAD2       | -                 | -      |
| NPC1L1        | -                 | -      |
| OLFM4         | -                 | -      |
| OTOF          | Sex               | 0.048  |
| PALM          | -                 | -      |
| PGF           | Sex               | 0.005  |
| PKDCC         | Smoking           | 0.006  |
| PRSS42        | -                 | -      |
| PVRL2         | -                 | -      |
| RBFOX3        | -                 | -      |
| RIMBP2        | -                 | -      |
| RNF152        | -                 | -      |
| RNF182        | -                 | -      |
| RP11-347C12.1 | -                 | -      |
| RPL3L         | -                 | -      |
| RUNDC3A       | -                 | -      |
| SFRP2         | -                 | -      |
| SLC16A9       | -                 | -      |
| SLC39A5       | -                 | -      |
| SLC51A        | -                 | -      |
| SMIM6         | -                 | -      |
| ST8SIA5       | -                 | -      |
| TDRD12        | -                 | -      |
| TEKT3         | Smoking           | 0.026  |
| TMPRSS9       | Sex               | 0.005  |
| TMSB4Y        | Sex               | <0.001 |
|               | IA family history | 0.007  |

|       |                   |        |
|-------|-------------------|--------|
| USP9Y | Sex               | 0.001  |
|       | Smoking           | 0.026  |
| UTS2  | Sex               | 0.001  |
|       | IA family history | 0.02   |
| UTY   | Sex               | 0.018  |
| ZFPM2 | -                 | -      |
| ZFY   | Sex               | <0.001 |
|       | IA family history | 0.033  |

\* For each gene, potentially confounding patient characteristics were evaluated for significance based on f-MANCOVA group-covariate interaction terms. Correction for multiple testing was also completed, and significance was defined as  $q\text{-value} < 0.05$ . Abbreviations: MANCOVA=multivariate analysis of covariance, DEG=differentially expressed gene, PHASES=population, hypertension, age, size, earlier subarachnoid hemorrhage, site; IA=intracranial aneurysm

## SUPPLEMENTAL FIGURES

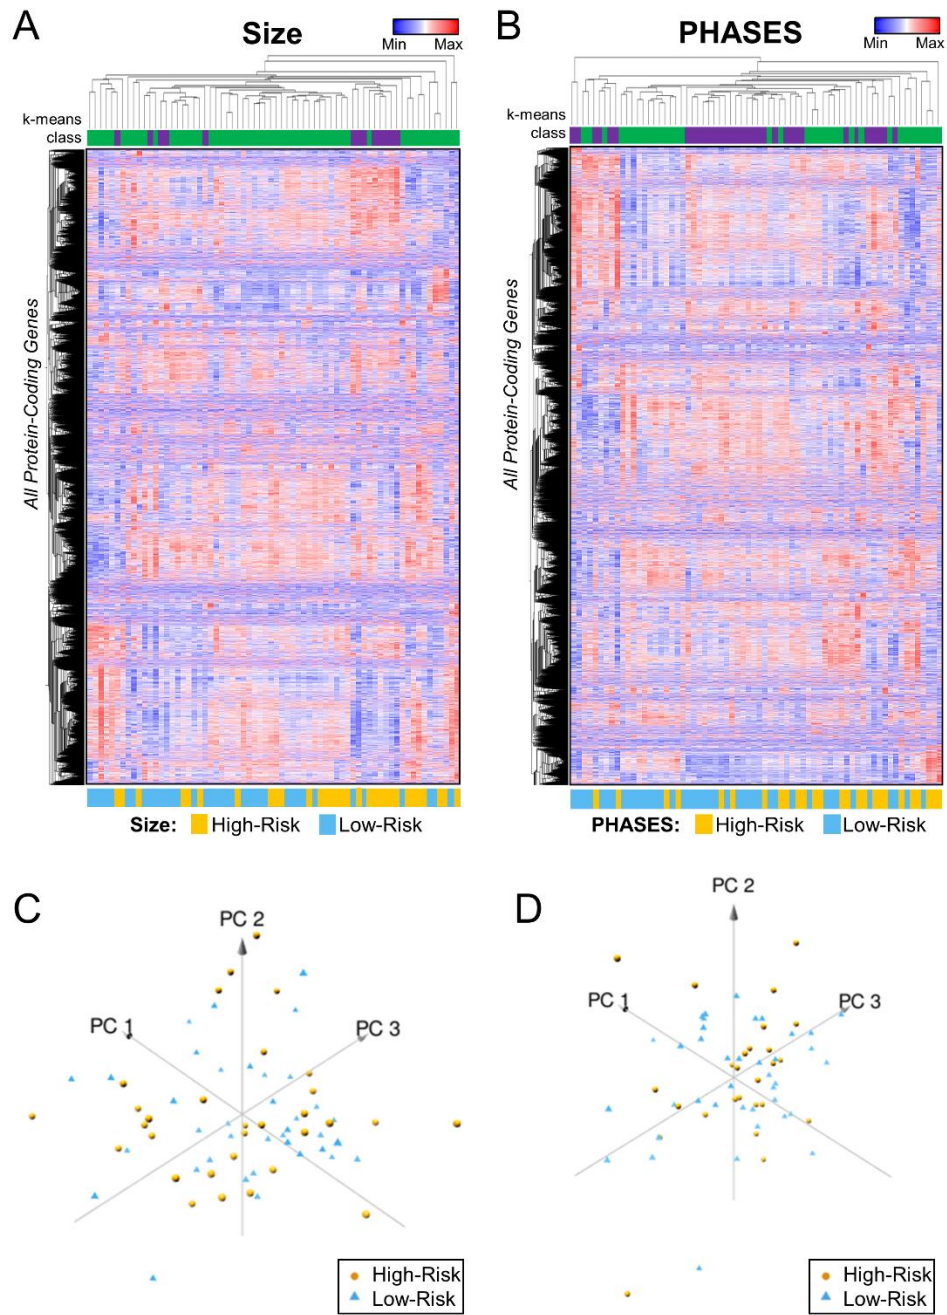

**Supplemental Figure 1. Visualization of Protein-Coding Gene Expression.** Heatmaps generated using TPM expression data of all protein-coding genes show poor grouping of low- and high-risk cases whether risk was classified by **(A)** aneurysm size or **(B)** PHASES score. K means clustering was generally inconclusive. Three-dimensional principal component analysis demonstrates separation between low- and high-risk samples based on both **(C)** aneurysm size and **(D)** PHASES score also showed only limited grouping of low- and high-risk cases. Abbreviations: Min=minimum, Max=maximum, PC=principal component, PHASES=Population, Hypertension, Age, Size, Earlier subarachnoid hemorrhage, Site

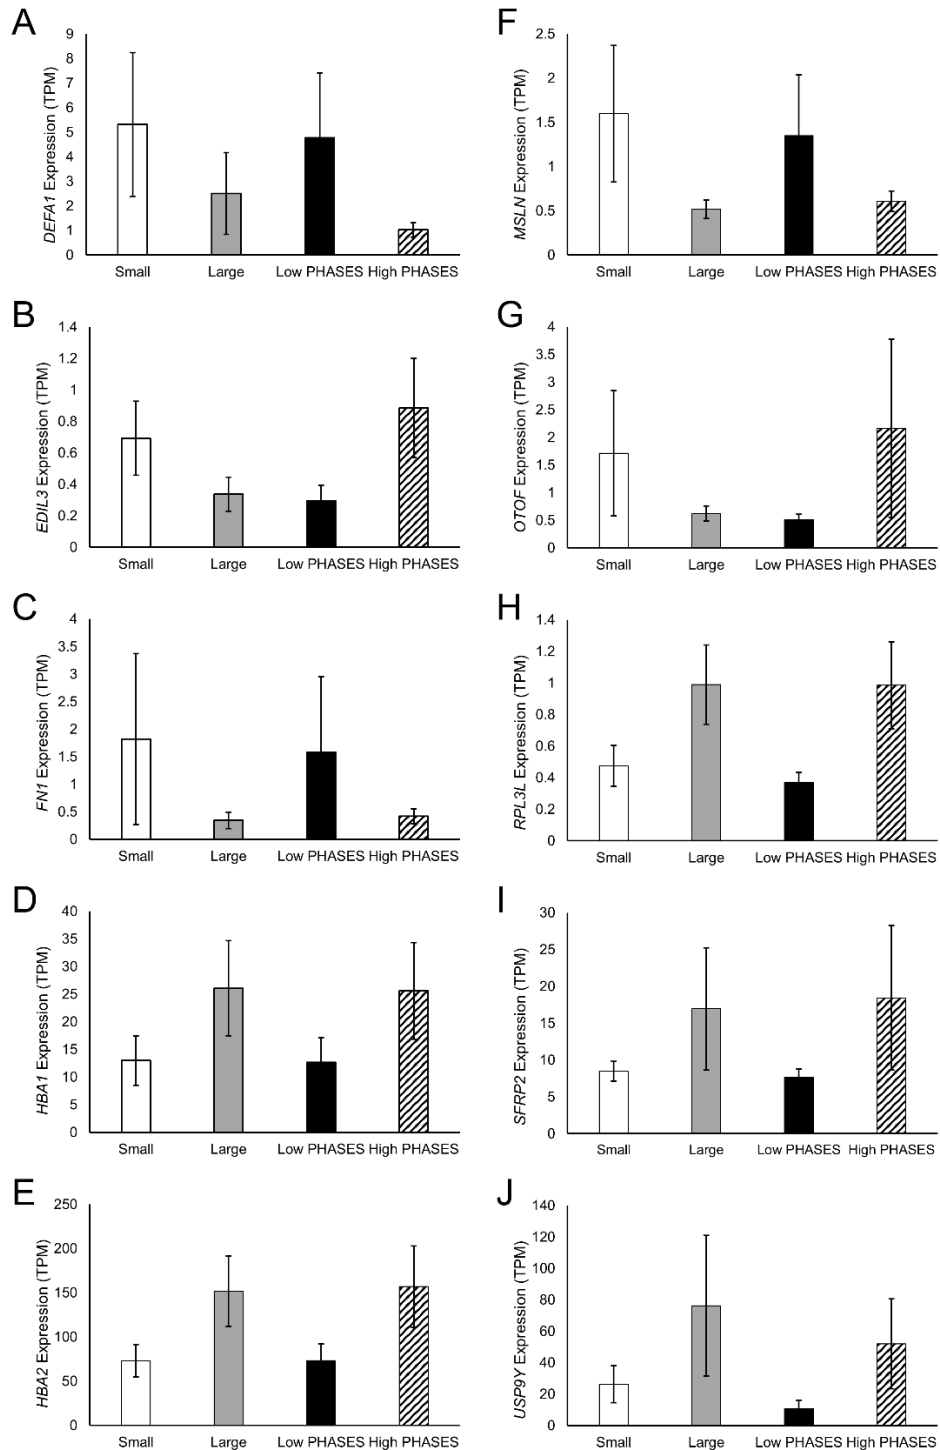

**Supplemental Figure 2. Plots of Expression Levels for the 10 Common DEGs.** The average TPM expression level ( $\pm$  standard error) for *DEFA1* (A), *EDIL3* (B), *FN1* (C), *HBA1* (D), *HBA2* (E), *MSLN* (F), *OTOF* (G), *RPL3L* (H), *SFRP2* (I), *USP9Y* (J) in each group (small IA, large IA, low PHASES, and high PHASES).

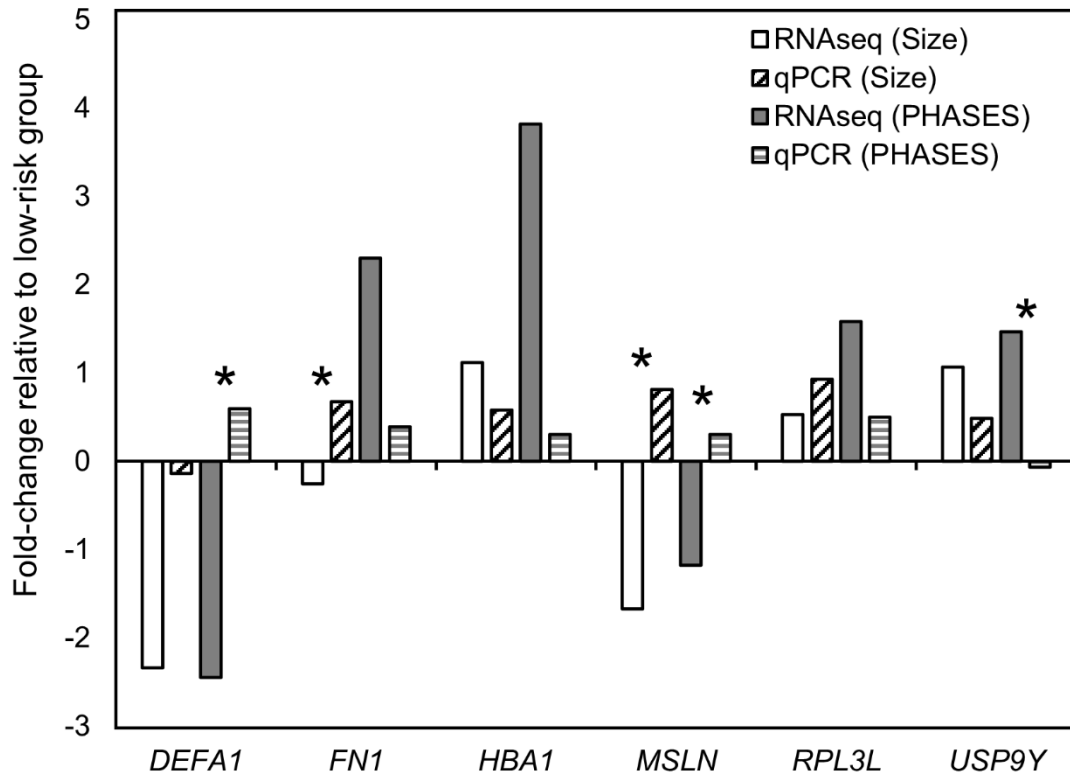

**Supplemental Figure 3. Verification of RNAseq by qPCR in a Subset of 30 Cases.** For high- vs. low-risk using aneurysm size and PHASES, expression differences in 6 of the 10 shared differentially expressed genes (*DEFA1*, *FN1*, *HBA1*, *MSLN*, *RPL3L*, and *USP9Y*) were generally in the same direction of fold-change and of similar magnitude when comparing RNAseq and qPCR data. The one main exception was *MSLN*, whose expression difference was opposite on qPCR for both comparisons. “\*” indicates differences between RNAseq and qPCR. Abbreviations: qPCR=quantitative polymerase chain reaction, RNAseq=RNA sequencing, PHASES=Population, Hypertension, Age, Size, Earlier subarachnoid hemorrhage, Site

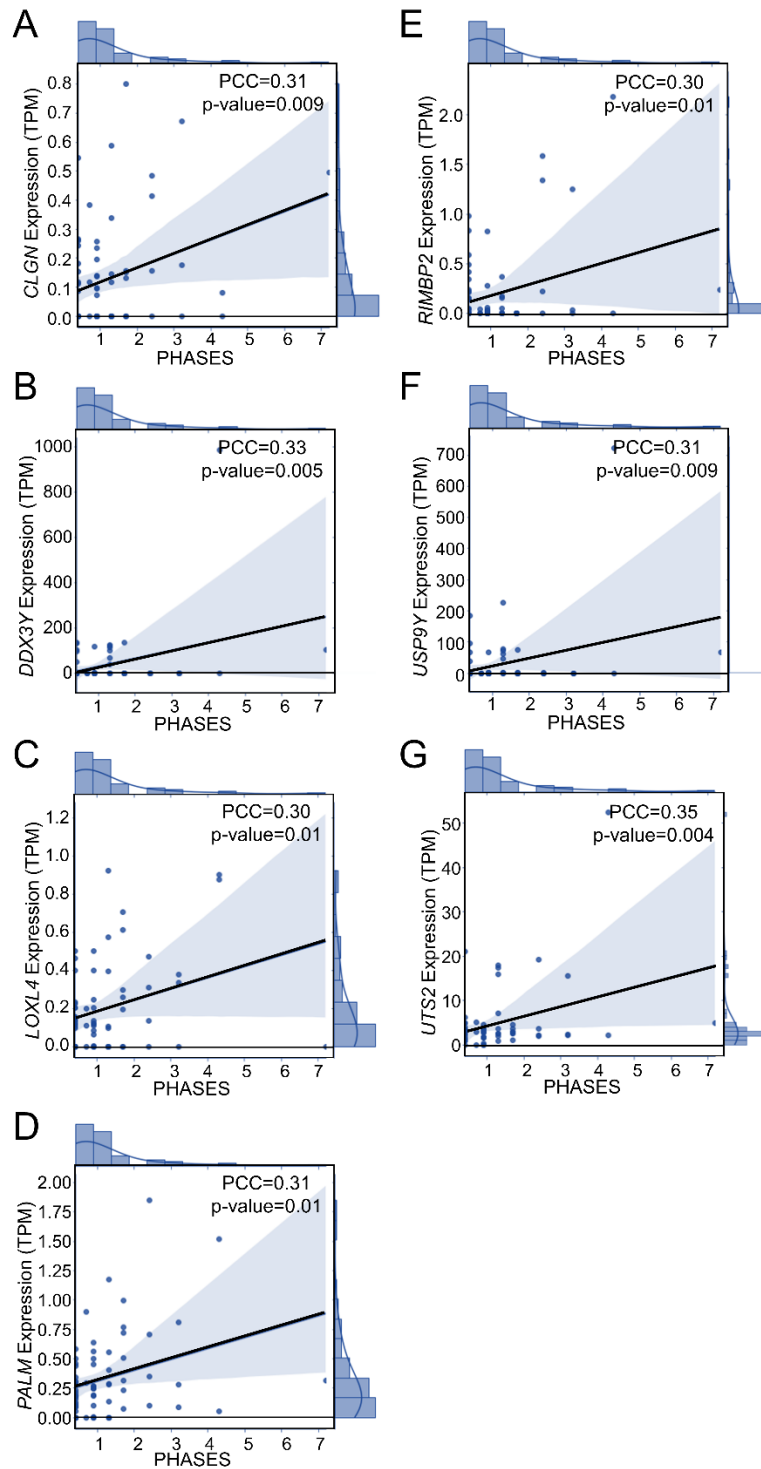

**Supplemental Figure 4. Additional Correlation Plots.** The other 7 genes with significant correlations to PHASES. **A).** *CLGN* has a PCC of 0.31. **B).** *DDX3Y* with a PCC of 0.33. **C).** *LOXL4* achieved a PCC of 0.30. **D).** *PALM* was positively correlated with a PCC of 0.31. **E).** *RIMBP2* also was weakly correlated with a PCC of 0.30 **F).** *USP9Y* had a PCC of 0.31. **G).** *UTS2* with a PCC of 0.35. Abbreviations: PCC=Pearson correlation coefficient, TPM=transcripts per million, PHASES=Population, Hypertension, Age, Size, Earlier subarachnoid hemorrhage, Site
